# Supplementary material
Source: PubMed Central journal article supplement (PMC4063214)
Supplement: NIHMS480420-supplement-Supplemental_material.pdf [file NIHMS480420-supplement-Supplemental_material.pdf]

# Appendix to “Automated Factor Slice Sampling” published in the Journal of Computational and Graphical Statistics

In this appendix, we compare the performance of the standard and factor univariate slice sampling algorithms applied to a non-linear, “banana-shaped” distribution (cf. Rosenbrock, 1960; Wraith et al., 2009).

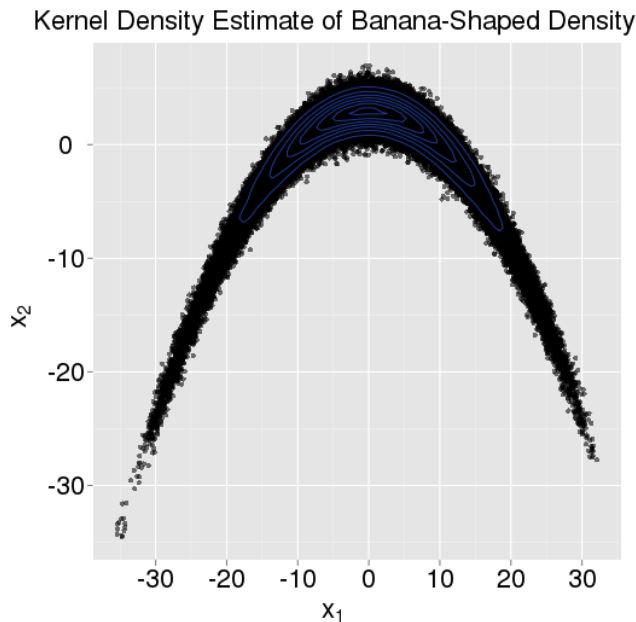

Figure 1: Kernel density estimate of Banana-shaped Distribution

**Example 1** (Banana-shaped Distribution). *Following the work of Wraith et al. (2009), we construct a  $p$ -dimensional “banana-shaped” distribution from a  $p$ -dimensional multivariate normal distribution with mean zero and covariance  $\Sigma = \text{diag}(\sigma_1^2, 1, 1, \dots, 1)$ . However, the distribution is twisted by altering the second coordinate  $x_2$  to be  $x_2 + b(x_1^2 - \sigma_1^2)$ . With the remaining coordinates unchanged, and noting that the Jacobian of this twist being 1, the banana-shaped distribution is given as:*

$$(x_1, x_2 + b(x_1^2 - \sigma_1^2), x_3, \dots, x_p) \sim \mathcal{N}_p(\mathbf{0}, \Sigma)$$

We choose  $p = 4$ ,  $\sigma_1^2 = 100$ , and  $b = 0.03$ .

For reference, we include the kernel density estimate of the first two components of the above distribution in Figure 1. We proceed, as suggested in Section 2, by varying the length

of the tuning phase as well as the tuning parameters values between the standard and factor slice samplers to ensure that both samplers function at peak performance. As before, the ES/sec times reflect the total run time (including time spent in the tuning phase) so that a fair comparison can be made. The univariate slice sampler was run for a shorter tuning phase of 10,000 samples during which the interval widths were tuned to ensure optimal performance (see Algorithm 5 in Section 3.2). The univariate factor slice sampler ran for a much longer tuning phase of 120,000 samples during which the interval widths were also tuned to ensure optimal performance using Algorithm 5 of Section 3.2. Algorithm 3 was used to tune the factor slice sampler for iteration number 10,000 through 110,000. After the tuning phase, both samplers drew 500,000 samples for the ESS and ES/sec computations listed below in Table 1.

Table 1: Comparison of Standard and Factor Slice Samplers on Non-Linear, Banana-shaped distribution (Example 1)

| Algorithm                             | $x_1$ |        | $x_2$ |        | $x_3$  |        | $x_4$  |        |
|---------------------------------------|-------|--------|-------|--------|--------|--------|--------|--------|
|                                       | ESS   | ES/sec | ESS   | ES/sec | ESS    | ES/sec | ESS    | ES/sec |
| Univariate<br>Slice Sampler           | 12298 | 5097   | 9036  | 3745   | 500000 | 207213 | 500000 | 207213 |
| Univariate<br>Factor Slice<br>Sampler | 12846 | 3014   | 9534  | 2237   | 500000 | 117304 | 500000 | 117304 |

In comparing the performance of the samplers, we see that the factor slice sampler provides a minimal improvement in the ESS of the first two components. However, the prolonged tuning phase and more expensive updates yielded a total run time of 4.26 seconds, in comparison with the shorter, 2.41 seconds, of the standard slice sampler. Hence, the standard slice sampler posts an ES/sec roughly 1.77 times better than that of the factor slice sampler.

This model accurately depicts the worst-case for the factor slice sampler. During the tuning phase, it estimated an orthogonal basis,  $\mathbf{\Gamma}$ , very close to a four dimension identity matrix. In practice, one could easily detect a lack of correlation in the posterior distribution of the parameters of interest (as the estimated orthogonal basis approaches an identity) and then switch to the standard slice sampler. This would've dropped the total run time from 4.26 seconds to roughly 3.21 seconds. Still, even in the worst case of strong non-linear dependence

with no linear dependence, the factor slice sampler does make a small improvement in ESS, while suffering only a marginal impact on total run time.

## References

Rosenbrock, H. H. (1960). An Automatic Method for Finding the Greatest or Least Value of a Function. *The Computer Journal*, 3(3):175–184.

Wraith, D., Kilbinger, M., Benabed, K., Cappé, O., Cardoso, J.-F. m. c., Fort, G., Prunet, S., and Robert, C. P. (2009). Estimation of cosmological parameters using adaptive importance sampling. *Phys. Rev. D*, 80:023507.
